# Supplementary material for: The structure of galactoglucomannan impacts the degradation under alkaline conditions
Source: Springer Nature journal article supplement (doi:10.1007/s10570-018-1737-z), 2018-03-10
Supplement: MOESM1 [file 15525150]

## Supplementary Materials

### The Structure of Galactoglucomannan Impacts the Degradation under Alkaline Conditions

Jennie Berglund<sup>1</sup>, Shoaib Azhar<sup>2</sup>, Martin Lawoko<sup>1</sup>, Mikael Lindström<sup>1</sup>, Francisco Vilaplana<sup>1,3</sup>,  
Jakob Wohlert<sup>1</sup>, Gunnar Henriksson<sup>1\*</sup>

<sup>1</sup>Wallenberg Wood Science Centre (WWSC), Department of Fibre and Polymer Technology, School of Engineering Sciences in Chemistry, Biotechnology and Health, KTH Royal Institute of Technology, SE-100 44 Stockholm, Sweden,

<sup>2</sup>AkzoNobel Pulp and Performance Chemicals, SE-85239, Sundsvall, Sweden

<sup>3</sup>Division of Glycoscience, School of Engineering Sciences in Chemistry, Biotechnology and Health, KTH Royal Institute of Technology, AlbaNova University Centre, SE-106 91 Stockholm, Sweden

\*E-mail: [g Henrik@kth.se](mailto:g Henrik@kth.se)

\*Phone: +46 8-790 61 63

## Hydroxide model

In traditional simulations it is challenging to describe hydroxide ions in a way that reproduce the thermodynamic behavior and correct coordination with surrounding media. Recently a model with polarized charge showed good structural properties using a polarizable force field (Hub, et al., 2014), and this model was later modified into a non-polarizable force field (Wolf, et al., 2014). In this work a similar translation from the polarizable model was made and the parameters used are described in Fig. S1. However, when verifying the coordination numbers with our system the interaction with water was too weak and an unphysical interaction with  $\text{Na}^+$  was observed. Therefore, an additional repulsion was added to a level where coordination between  $\text{O}^*$  and  $\text{Na}^+$  was avoided, the potentials were  $\sigma = 3.5 \text{ \AA}$  and  $\epsilon = 0.19694 \text{ kJ/mol}$ . This resulted in a good model and the coordination number between  $\text{O}^*$  and water oxygen was 4.1, which is similar to the value 4.2 observed by neutron scattering of 2M NaOH solution (McLain, et al., 2006) and 4.4 which was obtained in (Hub et al. 2014).

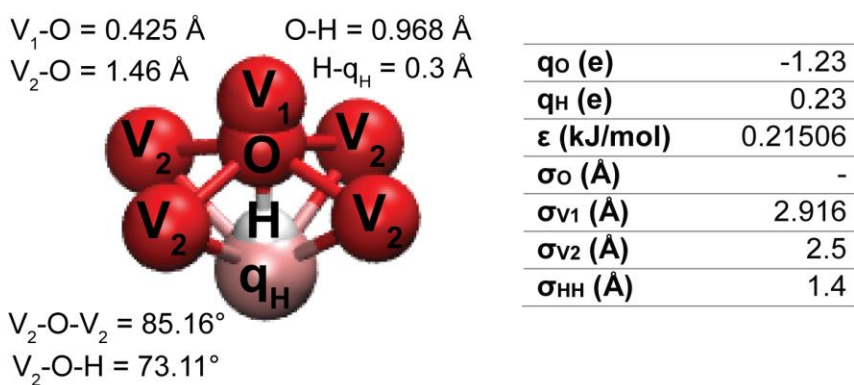

**Fig. S1** OH-model used in this work, parameters based on previous work (Hub, et al. 2014; Wolf, et al., 2014).

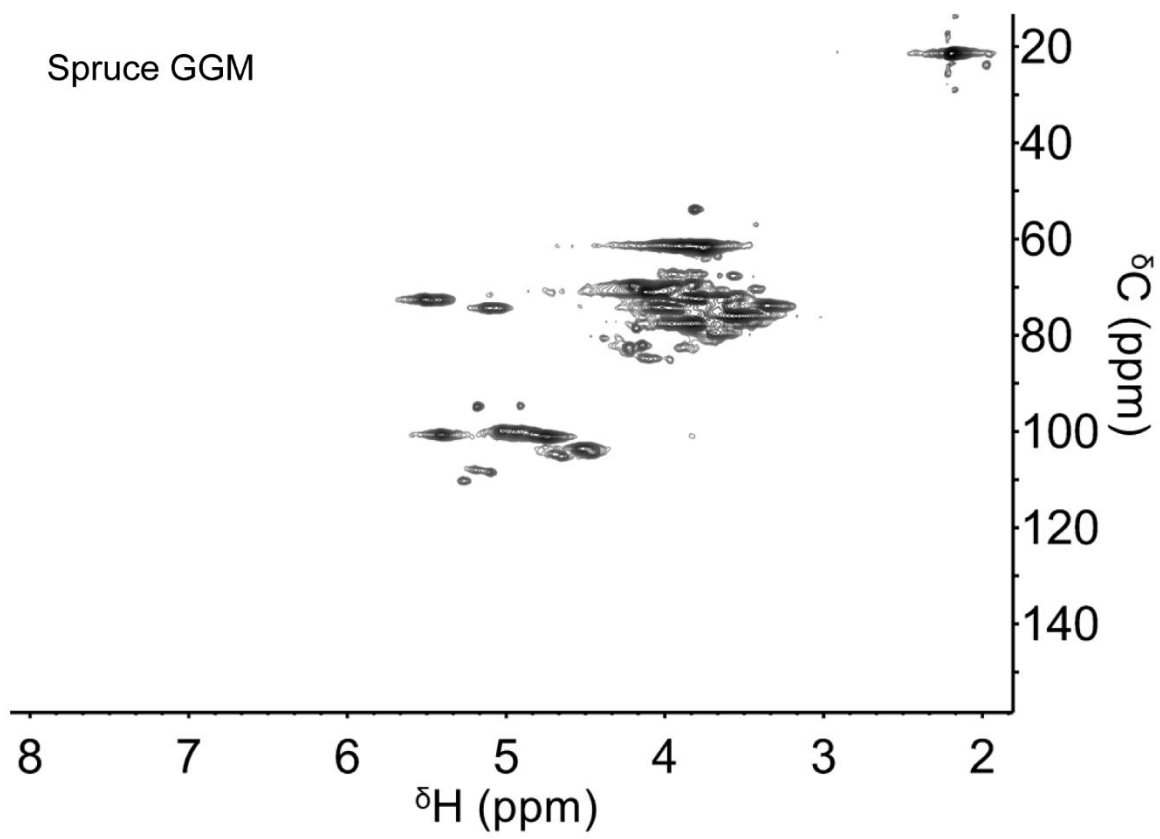

**Fig. S2** Full HSQC NMR spectrum of spruce GGM in  $\text{D}_2\text{O}$ .

**Table S1** NMR assignments. M=mannose, G=glucose, Gal=galactose, Ara=arabinose. Assignments are made according to earlier work by Hannuksela and Hervé du Penhoat (2004).

|                                                | <b>Explanation</b>                | <b><math>\delta^{\text{H}} / \delta^{\text{C}}</math> (ppm)</b> |
|------------------------------------------------|-----------------------------------|-----------------------------------------------------------------|
| <b>M1(int)</b>                                 | C6                                | 4.7 / 101.0                                                     |
| <b>M1<sub>MBOAc</sub></b>                      | C1 when C3 is acetylated          | 4.8 / 100.4                                                     |
| <b>M1<sub>M2OAc</sub></b>                      | C1 when C2 is acetylated          | 4.9 / 100.0                                                     |
| <b>M1<sub><math>\alpha</math>(red)</sub></b>   | C1 reducing end, $\alpha$ config. | 5.2 / 94.8                                                      |
| <b>M1<sub><math>\beta</math>(red)</sub></b>    | C1 reducing end, $\beta$ config.  | 4.9 / 94.6                                                      |
| <b>M2</b>                                      | C2                                | 4.1 / 70.7                                                      |
| <b>M2<sub>MBOAc</sub></b>                      | C2 when C3 is acetylated          | 4.2 / 69.6                                                      |
| <b>M2-OAc</b>                                  | Acetylated C2                     | 5.5 / 72.5                                                      |
| <b>M3</b>                                      | C3                                | 3.8 / 72.2                                                      |
| <b>M3-OAc</b>                                  | Acetylated C3                     | 5.1 / 74.4                                                      |
| <b>M4<sub>M2OAc</sub></b>                      | C4 when M2 is acetylated          | 3.8 / 77.4                                                      |
| <b>M4<sub>MBOAc</sub></b>                      | C4 when M3 is acetylated          | 4.0 / 74.1                                                      |
| <b>M5<sub>M2OAc</sub></b>                      | C5 when M2 is acetylated          | 3.5 / 76.0                                                      |
| <b>M6</b>                                      | C6 (Man and Glc overlap)          | 3.8 / 61.9                                                      |
| <b>M6<sub>M2OAc</sub></b>                      | C6 when C2 is acetylated          | 3.9 / 67.4                                                      |
| <b>G1(int)</b>                                 | C1 internal                       | 4.5 / 103.8                                                     |
| <b>G2</b>                                      | C2                                | 3.3 / 74.0                                                      |
| <b>G4</b>                                      | C4                                | 3.7 / 80.0                                                      |
| <b>G6</b>                                      | C6 (Man and Glc overlap)          | 3.8 / 61.9                                                      |
| <b>Gal1<sub><math>\alpha</math>(int)</sub></b> | C1 internal, $\alpha$ config.     | 5.0 / 99.8                                                      |
| <b>Gal1<sub><math>\beta</math>(int)</sub></b>  | C1 internal, $\beta$ config.      | 4.7 / 105.1                                                     |
| <b>Ara1(int)</b>                               | C1 internal                       | 5.3 / 110.1                                                     |
| <b>Ara2</b>                                    | C2                                | 4.0 / 84.8                                                      |
| <b>Ara3</b>                                    | C3                                | 3.9 / 82.4                                                      |
| <b>Ara4</b>                                    | C4                                | 4.1 / 84.8                                                      |
| <b>OAc</b>                                     | O-acetyl group                    | 2.2 / 21.6                                                      |
| <b>OCH3</b>                                    | Methoxy group                     | 3.8 / 53.8                                                      |

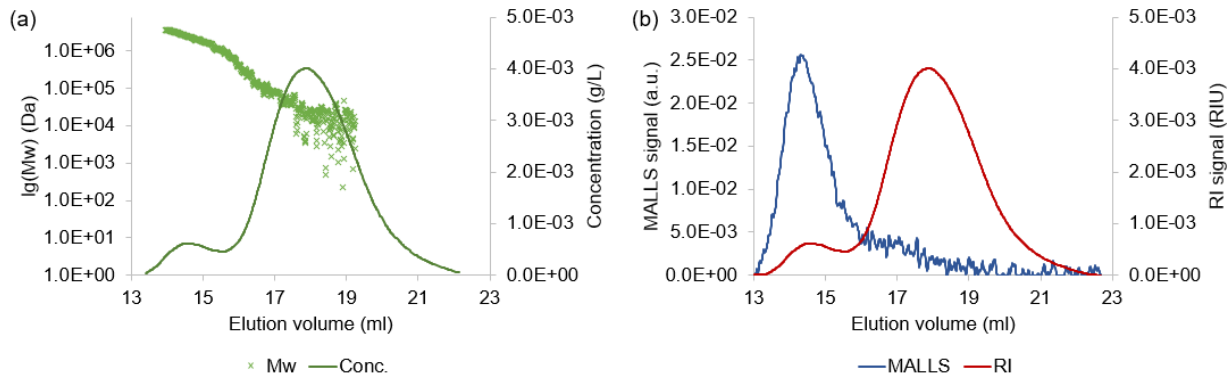

**Fig. S3** Molecular weight distribution of spruce GGM determined by SEC-RI-MALLS (eluent DMSO 0.5% LiBr).

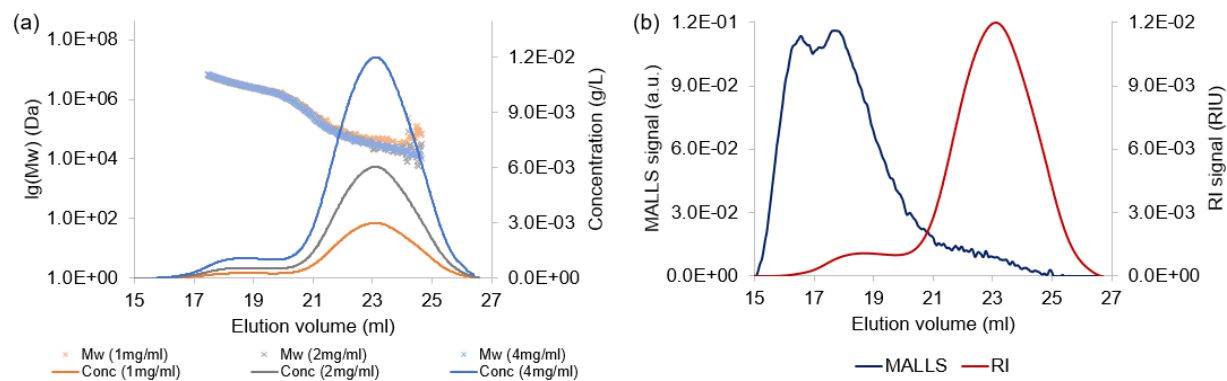

**Fig. S4** Molecular weight distribution of spruce GGM determined by SEC-RI-MALLS (eluent 0.1 M  $\text{NaNO}_3$  and 5 mM  $\text{NaN}_3$ ).

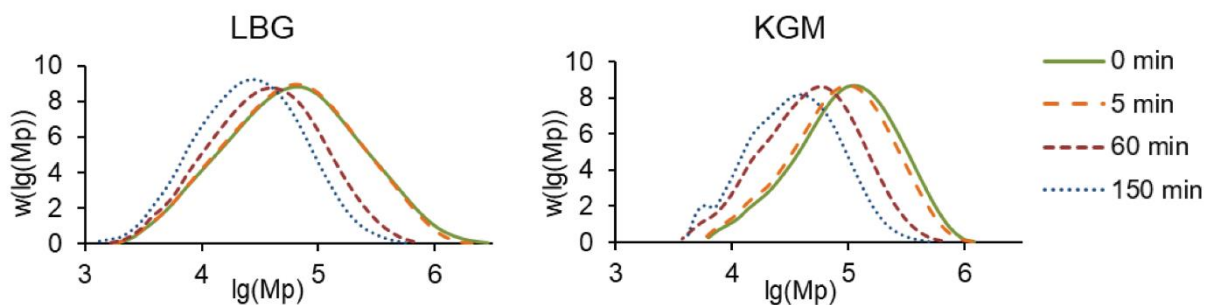

**Fig. S5** Molecular weight distributions of LBG and KGM determined by SEC analysis in 10 mM NaOH.

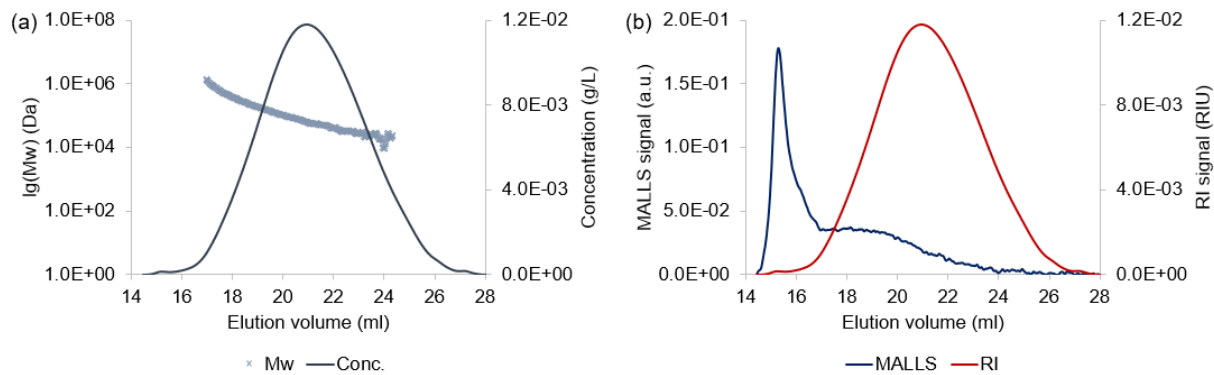

**Fig. S6** Molecular weight distribution of LGB determined by SEC-RI-MALLS (eluent 0.1 M NaNO<sub>3</sub> and 5 mM NaN<sub>3</sub>).

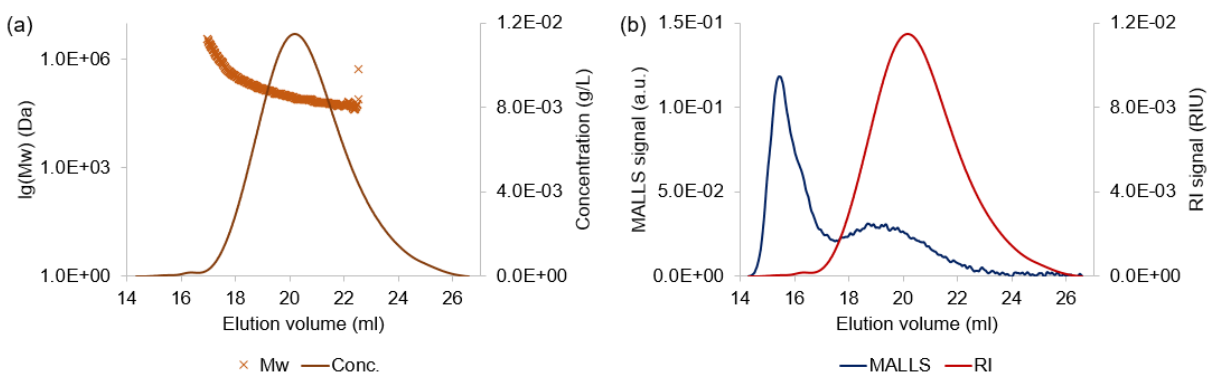

**Fig. S7** Molecular weight distribution of KGM determined by SEC-RI-MALLS (eluent 0.1 M NaNO<sub>3</sub> and 5 mM NaN<sub>3</sub>).

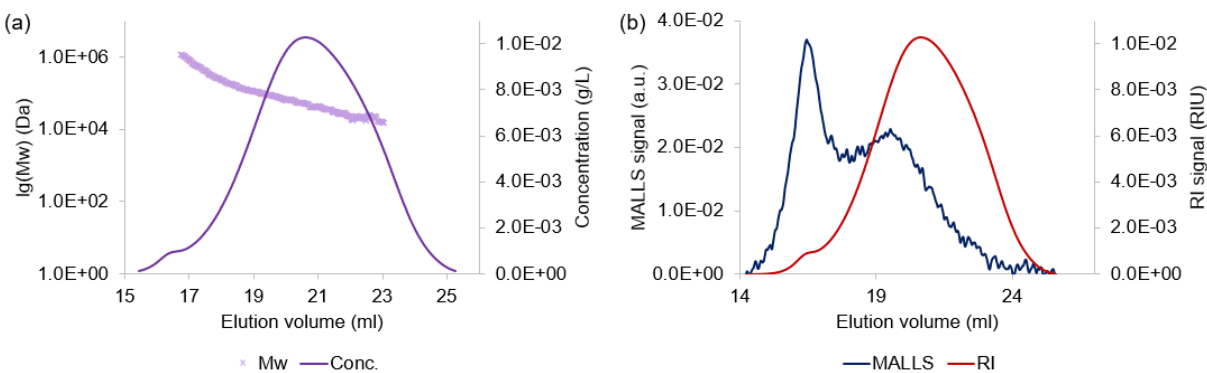

**Fig. S8** Molecular weight distribution of CMC determined by SEC-RI-MALLS (eluent 0.1 M NaNO<sub>3</sub> and 5 mM NaN<sub>3</sub>).

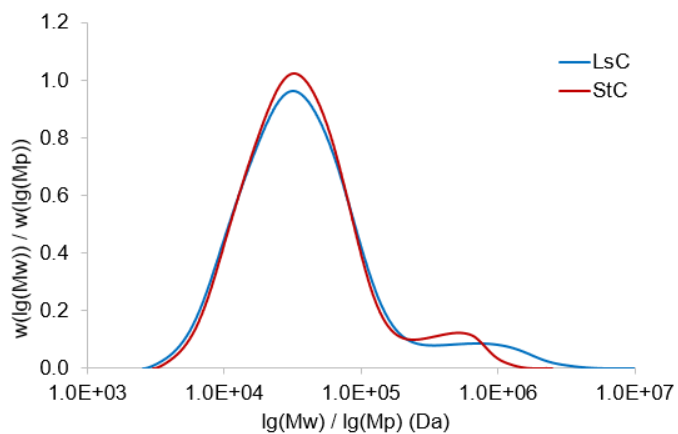

**Fig. S9** Molecular weight distribution of spruce GGM determined by SEC with light scattering (LsC) and standard (StC) calibration separately (analyzed by SEC-RI-MALLS with eluent 0.1 M NaNO<sub>3</sub> and 5 mM NaN<sub>3</sub>).

**Table S2** Comparison between Mw calculated by standard calibration (StC) and light scattering (LsC) analyzed in 0.1 M NaNO<sub>3</sub> and 5 mM NaN<sub>3</sub>.

|               | <b>Mw StC</b> | <b>Mw LsC</b> |
|---------------|---------------|---------------|
| <b>GGM-P2</b> | 37 100        | 39 300        |
| <b>GGM-P1</b> | 492 900       | 358 600       |
| <b>LBG</b>    | 187 300       | 89 700        |
| <b>KGM</b>    | 213 100       | 93 800        |
| <b>CMC</b>    | 227 300       | 70 800        |

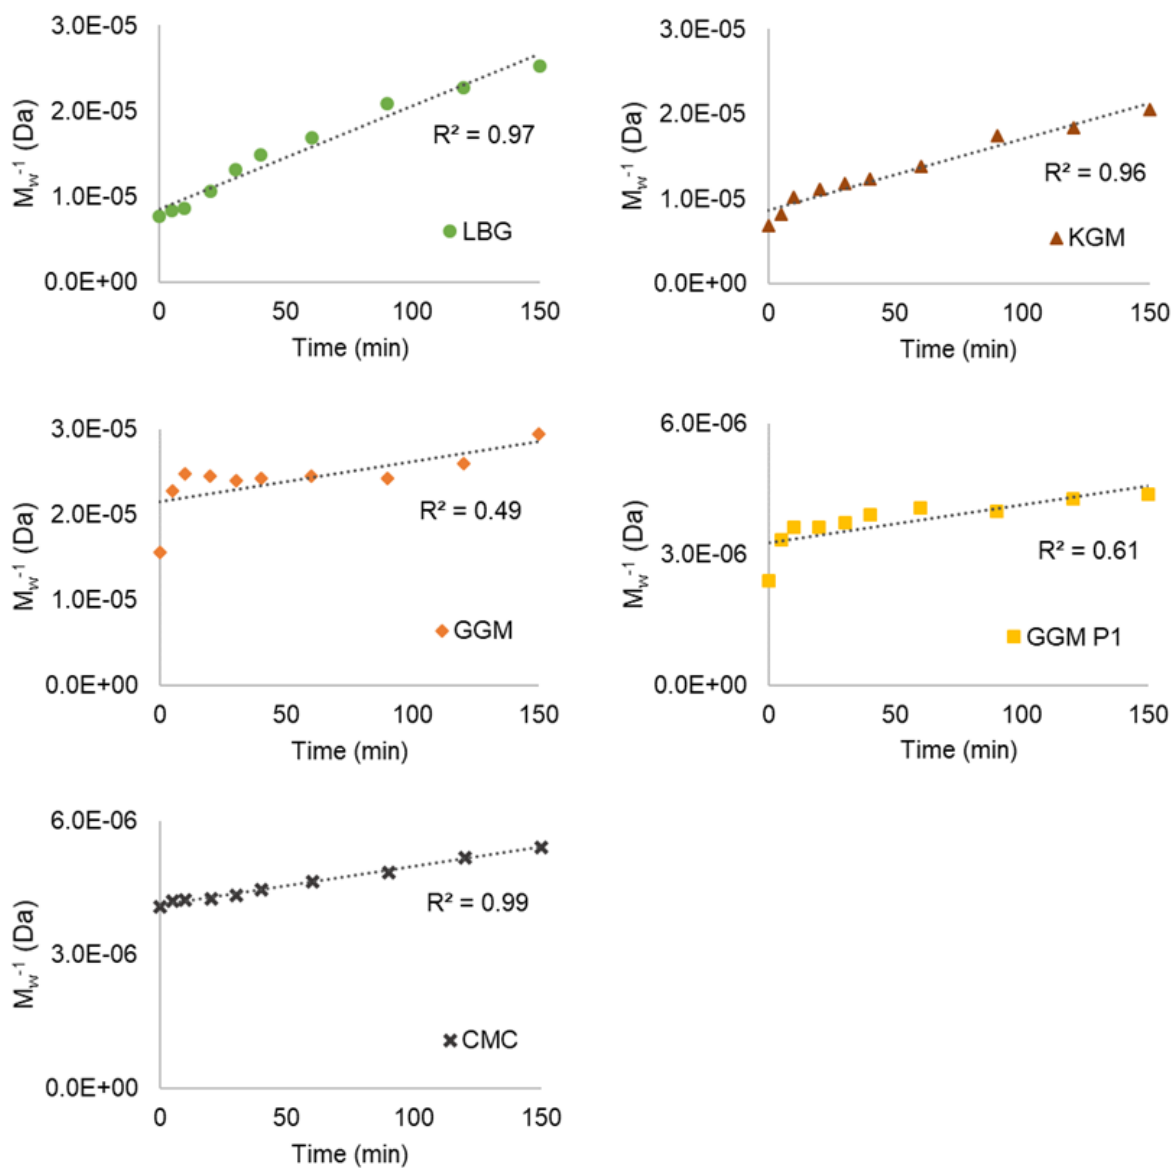

**Fig. S10** Analysis of  $(M_w)^{-1}$  to time for comparison with the model for random depolymerisation as also performed in Pu et al. (2017) comparing to the Malhotra model (Malhotra, 1986).



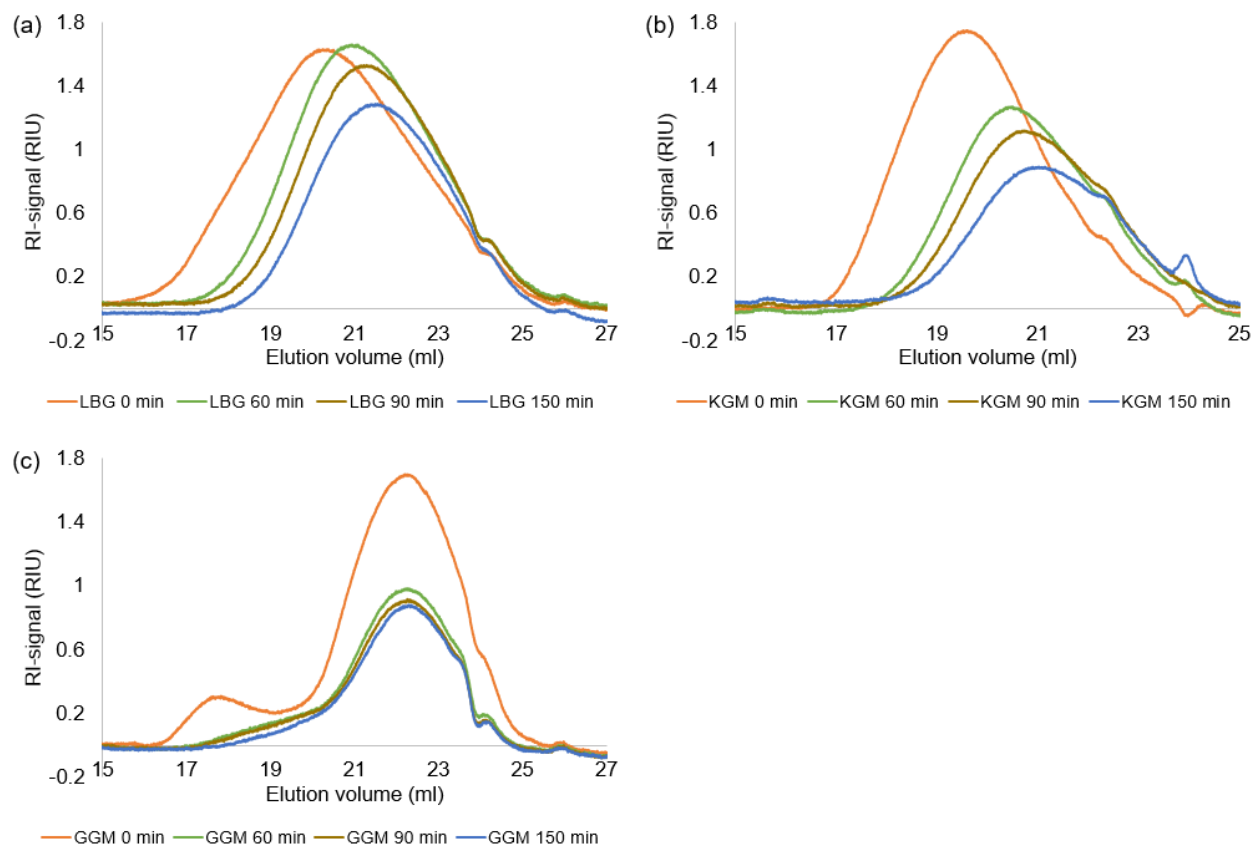

**Fig. S11** Raw data of RI-detector responses of (a) LBG, (b) KGM, and (c) GGM in 10 mM NaOH SEC. The RI-signal is concentration dependent and therefore this shows that the yields are decreasing during treatment, however, samples are dialyzed which might alter the concentrations slightly.

**Table S3** Sugar composition of the studied mannans given in percent (%) of each sugar.

|            |                         | <b>Arabinose</b> | <b>Galactose</b> | <b>Glucose</b> | <b>Xylose</b> | <b>Mannose</b> |           |
|------------|-------------------------|------------------|------------------|----------------|---------------|----------------|-----------|
| <b>GGM</b> | 0 min                   | 2.9              | 10.9             | 27.0           | 0.7           | 58.5           |           |
|            | 5 min                   | 2.6              | 9.4              | 28.0           | 0.7           | 59.2           |           |
|            | 10 min                  | 2.8              | 8.5              | 28.3           | 0.7           | 59.7           |           |
|            | 20 min                  | 2.9              | 8.9              | 29.2           | 0.8           | 58.2           |           |
|            | 30 min                  | 3.5              | 9.6              | 30.2           | 1.0           | 55.8           |           |
|            | 40 min                  | 3.7              | 9.4              | 31.3           | 1.0           | 54.6           |           |
|            | 60 min                  | 4.1              | 9.7              | 32.9           | 1.2           | 52.2           |           |
|            | 90 min                  | 4.5              | 10.3             | 33.4           | 1.3           | 50.4           |           |
|            | 120 min                 | 4.9              | 9.7              | 32.2           | 1.3           | 51.9           |           |
|            | 150 min                 | 4.8              | 10.1             | 33.2           | 1.3           | 50.5           |           |
|            | <b>LBG</b>              | 0 min            | 0.3              | 20.7           | 0.7           | 0.1            | 78.2      |
|            |                         | 5 min            | 0.3              | 20.4           | 0.7           | 0.1            | 78.5      |
|            |                         | 10 min           | 0.3              | 20.3           | 0.7           | 0.1            | 78.5      |
|            |                         | 20 min           | 0.3              | 19.9           | 0.7           | 0.1            | 79.0      |
|            |                         | 30 min           | 0.4              | 20.2           | 1.0           | 0.1            | 78.3      |
| 40 min     |                         | 0.4              | 20.4             | 1.0            | 0.1           | 78.1           |           |
| 60 min     |                         | 0.4              | 20.5             | 0.8            | 0.1           | 78.2           |           |
| 90 min     |                         | 0.4              | 20.3             | 0.7            | 0.1           | 78.5           |           |
| 120 min    |                         | 0.4              | 19.9             | 0.6            | 0.1           | 78.9           |           |
| 150 min    |                         | 0.4              | 20.4             | 0.7            | 0.1           | 78.4           |           |
| <b>KGM</b> |                         | 0 min            | 0.2              | 1.2            | 36.2          | 0.1            | 62.3      |
|            |                         | 5 min            | 0.3              | 1.7            | 36.7          | 0.2            | 61.1      |
|            |                         | 10 min           | 0.4              | 1.9            | 36.8          | 0.2            | 60.8      |
|            |                         | 20 min           | 0.2              | 1.5            | 36.0          | 0.2            | 62.1      |
|            |                         | 30 min           | 0.3              | 0.9            | 35.9          | 0.2            | 62.7      |
|            | 40 min                  | 0.2              | 1.4              | 36.4           | 0.2           | 61.9           |           |
|            | 60 min                  | 0.3              | 1.8              | 37.0           | 0.2           | 60.7           |           |
|            | 90 min                  | 0.2              | 1.2              | 36.1           | 0.3           | 62.2           |           |
|            | 120 min                 | 0.3              | 1.7              | 36.7           | 0.2           | 61.1           |           |
|            | 150 min                 | 0.6              | 3.1              | 37.7           | 0.4           | 58.2           |           |
|            | <b>Standard error ±</b> |                  | 0.02-0.40        | 0.02-0.82      | 0.02-0.91     | 0.01-0.17      | 0.14-2.08 |

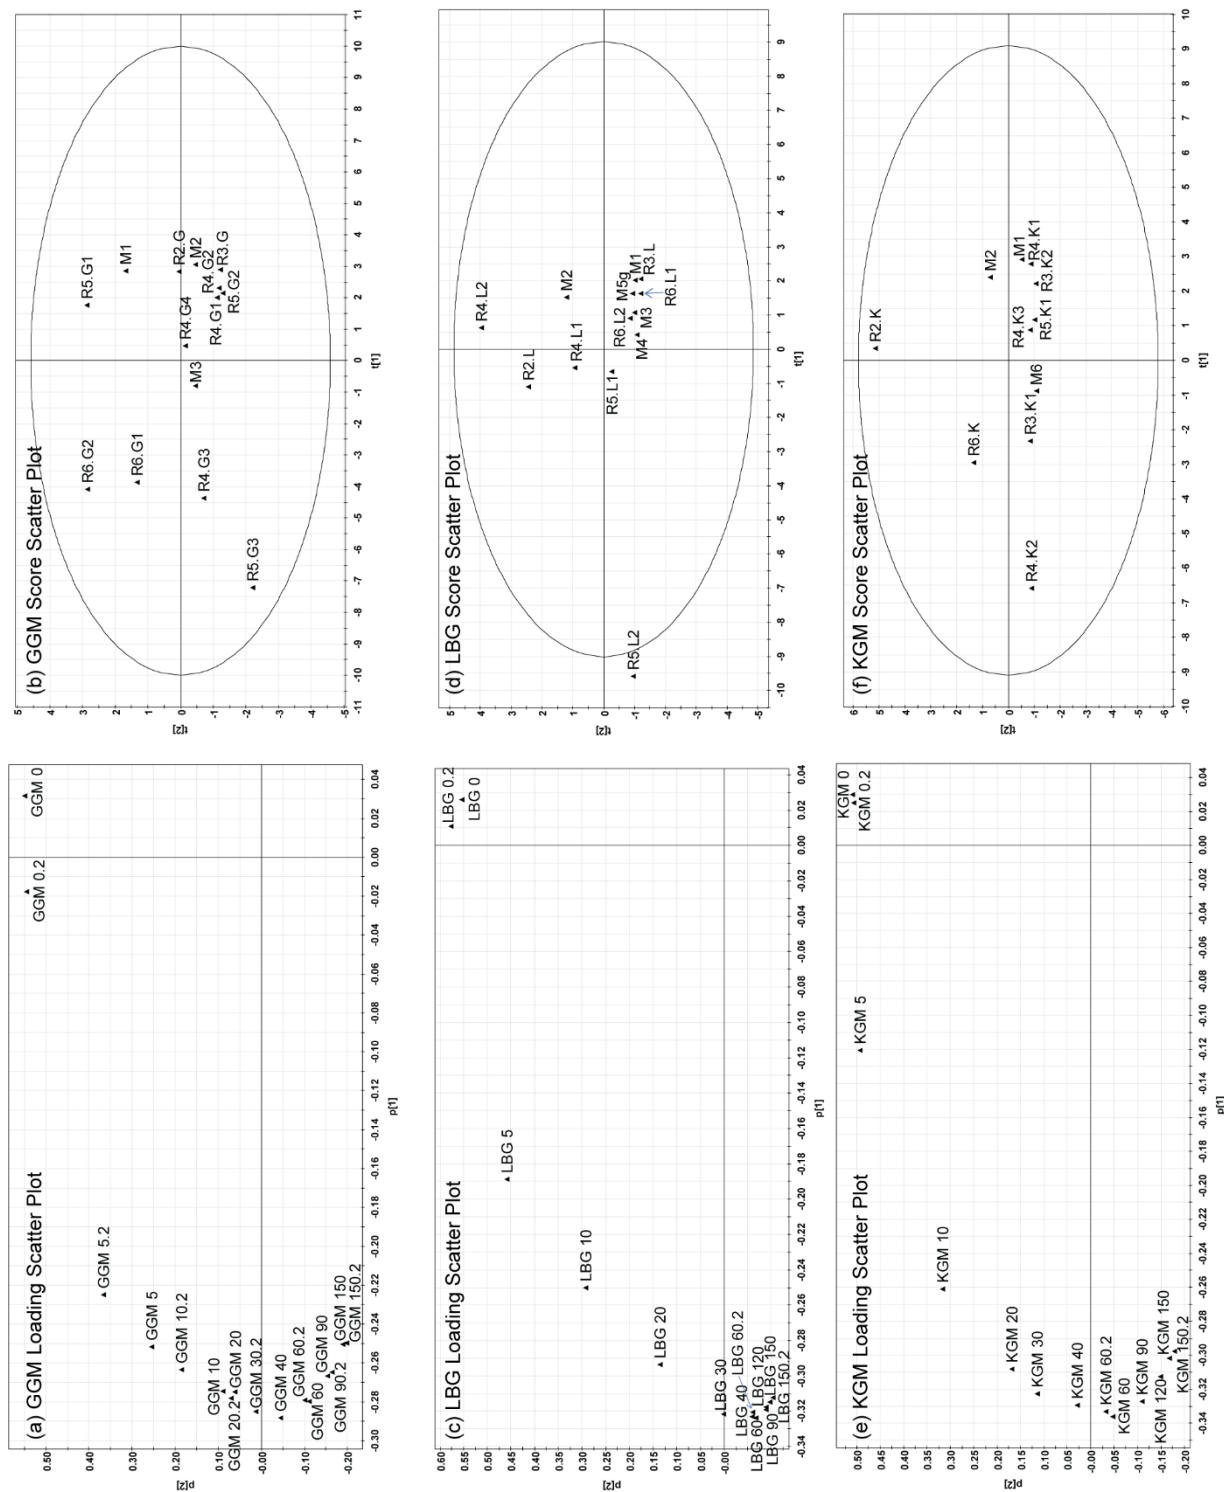

**Fig. S12** PCA analysis of the oligomer spectrums. Plots are based on the first two principal components. These two components explain 74, 72, and 67 % of the variance for GGM, LBG and KGM, respectively. Names ending with “.2” represent duplicate samples.

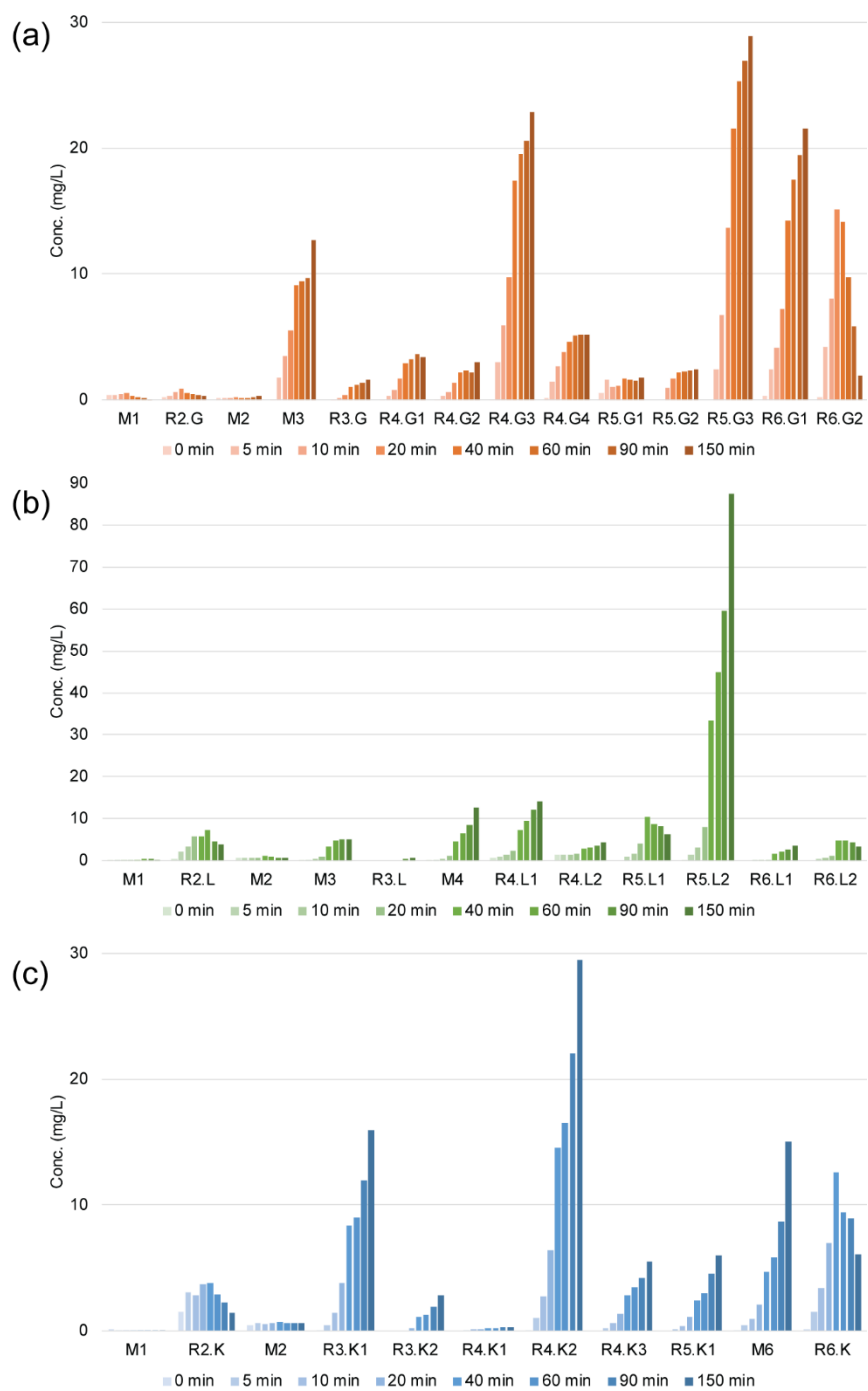

**Fig. S13** Oligomer concentration for (a) GGM, (b) LBG, and (c) KGM.

**Table S4** Probability for the conformation of  $\omega_{\text{Gal}}$  in (%).

|                | MMM | MGMM | MMLM | MGLM | MLLM | MLLM |
|----------------|-----|------|------|------|------|------|
| <b>gt 300K</b> | 20  | 20   | 7    | 8    | 6    | 25   |
| <b>tg 300K</b> | 25  | 20   | 18   | 7    | 13   | 24   |
| <b>gg 300K</b> | 55  | 60   | 75   | 85   | 81   | 51   |
| <b>gt 366K</b> | 23  | 22   | 10   | 12   | 8    | 25   |
| <b>tg 366K</b> | 29  | 24   | 21   | 12   | 17   | 26   |
| <b>gg 366K</b> | 49  | 53   | 70   | 75   | 75   | 49   |

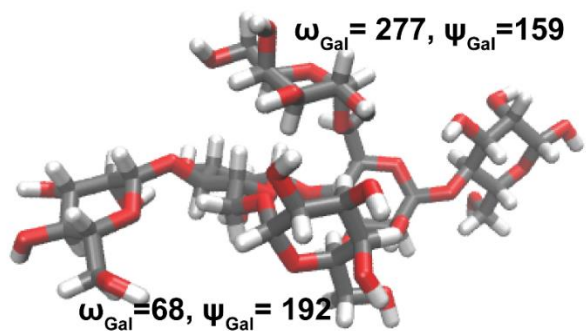

**Fig. S14** Snapshot of MLLM oligomer.

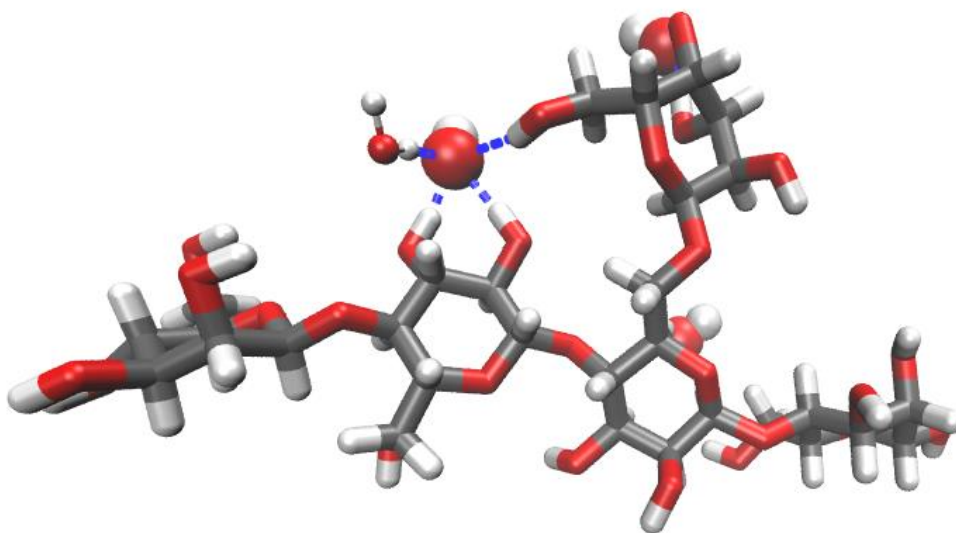

**Fig. S15** Snapshot from the simulation showing OH<sup>-</sup>-coordination by Glc, Gal and one water molecule.

## References

- Hannuksela, T., & Hervé du Penhoat, C. (2004). NMR structural determination of dissolved O-acetylated galactoglucomannan isolated from spruce thermomechanical pulp. *Carbohydr. Res.*, *339*, 301-312.
- Hub, J. S., Wolf, M. G., Caleman, C., van Maaren, P. J., Groenhof, G., & van der Spoel, D. (2014). Thermodynamics of hydronium and hydroxide surface solvation. *Chem. Sci.*, *5*, 1745-1749.
- Malhotra, S. L. (1986). Ultrasonic Solution Degradations of Poly(Alkyl Methacrylates). *J. Macromol. Sci.-Chem.*, *A23*, 729-748.
- McLain, S., Imberti, S., Soper, A., Botti, A., Bruni, F., & Ricci, M. (2006). Structure of 2 molar NaOH in aqueous solution from neutron diffraction and empirical potential structural refinement. *Phys. Rev. B*, *74*, 094201.
- Pu, Y., Zou, Q., Hou, D., Zhang, Y., & Chen, S. (2017). Molecular weight kinetics and chain scission models for dextranpolymers during ultrasonic degradation. *Carbohydr. Polym.*, *156*, 71-76.
- Wolf, M. G., Grubmüller, H., & Groenhof, G. (2014). Anomalous surface diffusion of protons on lipid membranes. *Biophys. J.*, *107*, 76-87.
